# Supplementary material for: Abundance of fluorescent biological aerosol particles at temperaturesconducive to the formation of mixed-phase and cirrus clouds
Source: Copernicus journal article supplement (doi:10.5194/acp-16-8205-2016), 2016-07-08
Supplement: Supplementary file [file acp-16-8205-2016-supplement-title-page.pdf › acp-16-8205-2016-supplement-title-page.pdf]

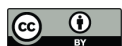

## *Supplement of*

# **Abundance of fluorescent biological aerosol particles at temperatures conducive to the formation of mixed-phase and cirrus clouds**

**Cynthia H. Twohy et al.**

*Correspondence to:* Cynthia H. Twohy (twohy@nwra.com)

- acp-16-8205-2016-supplement-title-page.pdf
- S1.txt
- S2.txt
- S3.txt
- S4.txt
- S5.txt
- S6.txt
- S7.txt
- S8.txt
- S9.txt

The copyright of individual parts of the supplement might differ from the CC-BY 3.0 licence.
